# Supplementary material for: Addressing social norms for adolescent timing and spacing of pregnancy in low and middle-income countries: Developing a global research agenda
Source: PubMed Central journal article supplement (PMC11565465; doi:10.7189/jogh.14.04206), 2024-11-15
Supplement: jogh-14-04206-s001.pdf [file jogh-14-04206-s001.pdf]

## Supplementary Data

**Table S1. Ranking by RPS for all 21 research questions across domains.**

| <b>Overall rank</b> | <b>Domain</b>                              | <b>Research question</b>                                                                                                                                                                         | <b>RPS</b> | <b>AEA</b> |
|---------------------|--------------------------------------------|--------------------------------------------------------------------------------------------------------------------------------------------------------------------------------------------------|------------|------------|
| 1                   | 2. Designing & implementing NSIs           | What interventions (strategies, activities) are effective in shifting norms related to adolescent and youth sexual and reproductive health behaviors/outcomes in LMICs?                          | 81%        | 70%        |
| 2                   | 2. Designing & implementing NSIs           | What are effective strategies to engage reference groups (i.e. gatekeepers) to support shifts in norms related to adolescent and youth sexual and reproductive health in LMICs?                  | 80%        | 67%        |
| 3                   | 3. Enhancing NSI monitoring and evaluation | What are practical and valid indicators and approaches to monitor norms-shifting related to adolescent and youth sexual and reproductive health interventions in LMICs?                          | 80%        | 68%        |
| 4                   | 4. Scaling and sustaining NSIs             | What are best practices for adapting norms-shifting interventions for adolescent and youth sexual and reproductive health in LMICs?                                                              | 79%        | 65%        |
| 5                   | 4. Scaling and sustaining NSIs             | What are different approaches for scaling sexual and reproductive health norms-shifting interventions for adolescents and youth across sectors (e.g., health, education, community) in LMICs?    | 78%        | 62%        |
| 6                   | 1. Understanding norms and their influence | How do norms influence behavior/outcomes differently depending on people's intersecting identities (e.g., socio-economic status, religion, disability, etc.) for adolescents and youth in LMICs? | 76%        | 61%        |
| 7                   | 3. Enhancing NSI monitoring and evaluation | What are practical and rigorous approaches (e.g., social network analysis, influence mapping, vignettes) to evaluate adolescent and youth norms-shifting interventions in LMICs?                 | 76%        | 61%        |
| 8                   | 4. Scaling and sustaining NSIs             | How effective are adolescent and youth norm shifting interventions after adaptation?                                                                                                             | 76%        | 60%        |
| 9                   | 4. Scaling and sustaining NSIs             | What program characteristics (e.g., frequency, duration, technologies utilized, strategies, participants, facilitators) facilitate scale up of sexual and reproductive                           | 76%        | 60%        |

|    |                                            |                                                                                                                                                                                                                                        |     |     |
|----|--------------------------------------------|----------------------------------------------------------------------------------------------------------------------------------------------------------------------------------------------------------------------------------------|-----|-----|
|    |                                            | health norms-shifting interventions for adolescents and youth in LMICs? How and why do they do so?                                                                                                                                     |     |     |
| 10 | 1. Understanding norms and their influence | How do social norms influence adolescent and youth sexual and reproductive health behaviors and outcomes?                                                                                                                              | 74% | 59% |
| 11 | 2. Designing & implementing NSIs           | How can adolescent and youth norm shifting initiatives engage a diverse consortium of stakeholders (e.g., community individuals and orgs partners, private and public organizations, governments) in intervention design and delivery? | 74% | 56% |
| 12 | 2. Designing & implementing NSIs           | What are the unintended consequences (both positive and negative) of adolescent and youth norms-shifting activities and strategies in LMICs? How can we mitigate negative unintended consequences (e.g., backlash)?                    | 73% | 57% |
| 13 | 3. Enhancing NSI monitoring and evaluation | How can we assess the costs and cost-effectiveness of norms-shifting interventions for adolescents and youth in LMICs?                                                                                                                 | 73% | 58% |
| 14 | 1. Understanding norms and their influence | What meta-norms (e.g., authority, gender ideology, control & violence) influence adolescent and youth sexual and reproductive health                                                                                                   | 72% | 56% |
| 15 | 3. Enhancing NSI monitoring and evaluation | What are reliable and valid measures of social norms constructs (e.g., descriptive norms, injunctive norms, sanctions) for adolescents and youth?                                                                                      | 72% | 56% |
| 16 | 4. Scaling and sustaining NSIs             | How does scaling adolescent and youth norms-shifting interventions differ with public (e.g., government) vs. private (e.g., non-governmental organization/faith-based organization) sector partners?                                   | 71% | 52% |
| 17 | 1. Understanding norms and their influence | How do social norms diffuse through social networks in different contexts?                                                                                                                                                             | 70% | 51% |
| 18 | 2. Designing & implementing NSIs           | How can adolescent and youth sexual and reproductive health norms shifting interventions effectively catalyze diffusion of effects beyond project participants?                                                                        | 69% | 56% |

|    |                                            |                                                                                                                                                                                          |     |     |
|----|--------------------------------------------|------------------------------------------------------------------------------------------------------------------------------------------------------------------------------------------|-----|-----|
| 19 | 1. Understanding norms and their influence | Which social norms constructs (e.g., descriptive norms, injunctive norms, sanctions) are related to adolescent and youth sexual and reproductive health behaviors/outcomes?              | 68% | 49% |
| 20 | 2. Designing & implementing NSIs           | Do planned diffusion strategies for adolescent and youth norms shifting interventions result in greater change than spontaneous diffusion?                                               | 66% | 53% |
| 21 | 1. Understanding norms and their influence | How do social norms related to adolescent and youth sexual and reproductive health shift at critical life course transitions (e.g., puberty, sexual debut, marriage, becoming a parent)? | 52% | 55% |

RPS: Research Priority Scores, AEA: Average Expert Agreement, AYSRH: Adolescent and Youth Sexual and Reproductive Health, SES: Socio-Economic Status, NGO: Non-Governmental Organization, FBO: Faith-Based Organization
